# Supplementary material for: In situ crystalline transformation of bis(halo)mercury(ii) coordination polymers to ionic chloro-bridged-bis(halo)mercury(ii) species via UV irradiation in chloroform media
Source: Royal Society of Chemistry journal article supplement (doi:10.1039/c6ce01378c), 2016-01-01
Supplement: c6ce01378c1.pdf [file c6ce01378c1.pdf]

<Electronic Supplementary Information>

***In situ* crystalline transformation of bis(halo)mercury(II) coordination  
polymers to ionic chloro-bridged-bis(halo)mercury(II) species via UV  
irradiation in chloroform media**

EunKyung Choi, Haeri Lee, Tae Hwan Noh and Ok-Sang Jung\*

*Department of Chemistry, Pusan National University, Busan 46241, Korea.*

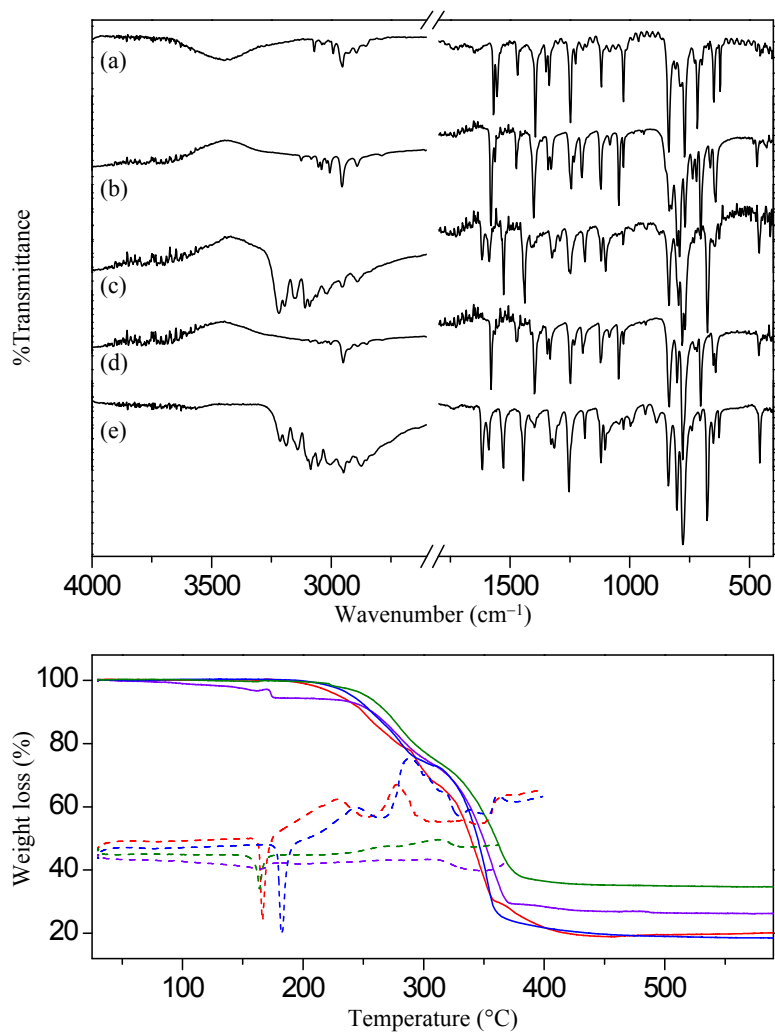

**Fig. S1** Top: IR spectra of L (a), [HgBr<sub>2</sub>L] (b), [H<sub>2</sub>L]<sup>2+</sup>[Hg<sub>2</sub>Br<sub>4</sub>(μ-Br)(μ-Cl)]<sup>2-</sup> (c), [HgI<sub>2</sub>L] (d), and [H<sub>2</sub>L]<sup>2+</sup>[HgI<sub>2</sub>(μ-Cl)]<sub>2</sub><sup>2-</sup> (e). Bottom: TGA (solid lines) and DSC (dashed lines) curves of [HgBr<sub>2</sub>L] (red), [H<sub>2</sub>L]<sup>2+</sup>[Hg<sub>2</sub>Br<sub>4</sub>(μ-Br)(μ-Cl)]<sup>2-</sup> (purple), [HgI<sub>2</sub>L] (blue), and [H<sub>2</sub>L]<sup>2+</sup>[HgI<sub>2</sub>(μ-Cl)]<sub>2</sub><sup>2-</sup> (green).

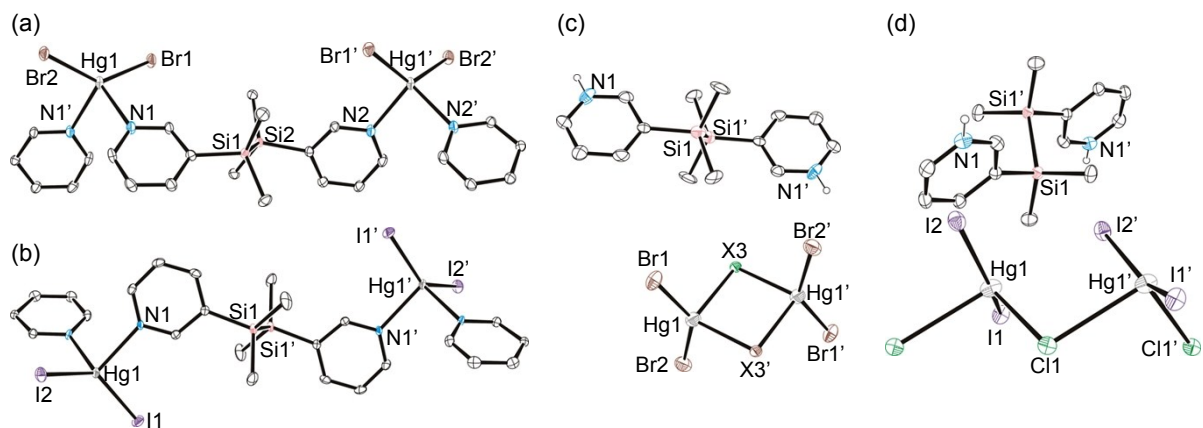

**Fig. S2** ORTEP drawings with anisotropic displacement parameters at 30% probability of  $[\text{HgBr}_2\text{L}]$  (a),  $[\text{HgI}_2\text{L}]$  (b),  $[\text{H}_2\text{L}]^{2+}[\text{Hg}_2\text{Br}_4(\mu\text{-Br})(\mu\text{-Cl})]^{2-}$  (c), and  $[\text{H}_2\text{L}]^{2+}[\text{HgI}_2(\mu\text{-Cl})]^{2-}$  (d). Hydrogen atoms (except for N–H) were omitted for clarity. In (c), the atoms X(3) and X(3') are both chloride and bromide anions with the occupancies of 50 : 50.

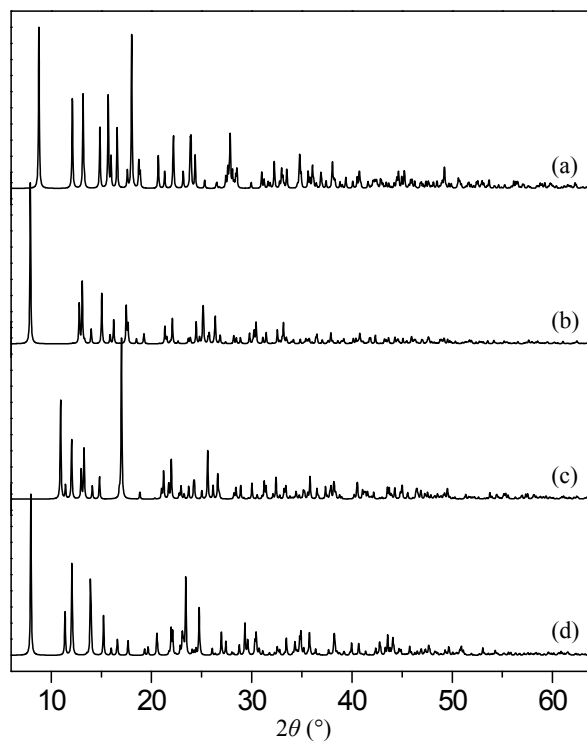

**Fig. S3** Powder XRD patterns of  $[\text{HgBr}_2\text{L}]$  (a),  $[\text{H}_2\text{L}]^{2+}[\text{Hg}_2\text{Br}_4(\mu\text{-Br})(\mu\text{-Cl})]^{2-}$  (b),  $[\text{HgI}_2\text{L}]$  (c), and  $[\text{H}_2\text{L}]^{2+}[\text{HgI}_2(\mu\text{-Cl})]_2^{2-}$  (d).

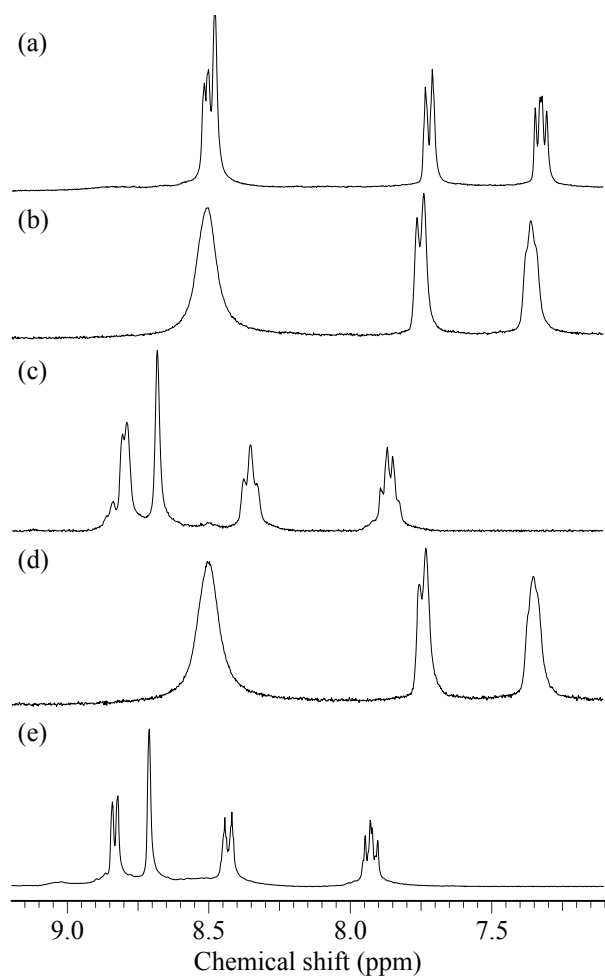

**Fig. S4** Partial  $^1\text{H}$  NMR spectra ( $\text{Me}_2\text{SO}-d_6$ ) of L (a),  $[\text{HgBr}_2\text{L}]$  (b),  $[\text{H}_2\text{L}]^{2+}[\text{Hg}_2\text{Br}_4(\mu\text{-Br})(\mu\text{-Cl})]^{2-}$  (c),  $[\text{HgI}_2\text{L}]$  (d), and  $[\text{H}_2\text{L}]^{2+}[\text{HgI}_2(\mu\text{-Cl})]_2^{2-}$  (e).

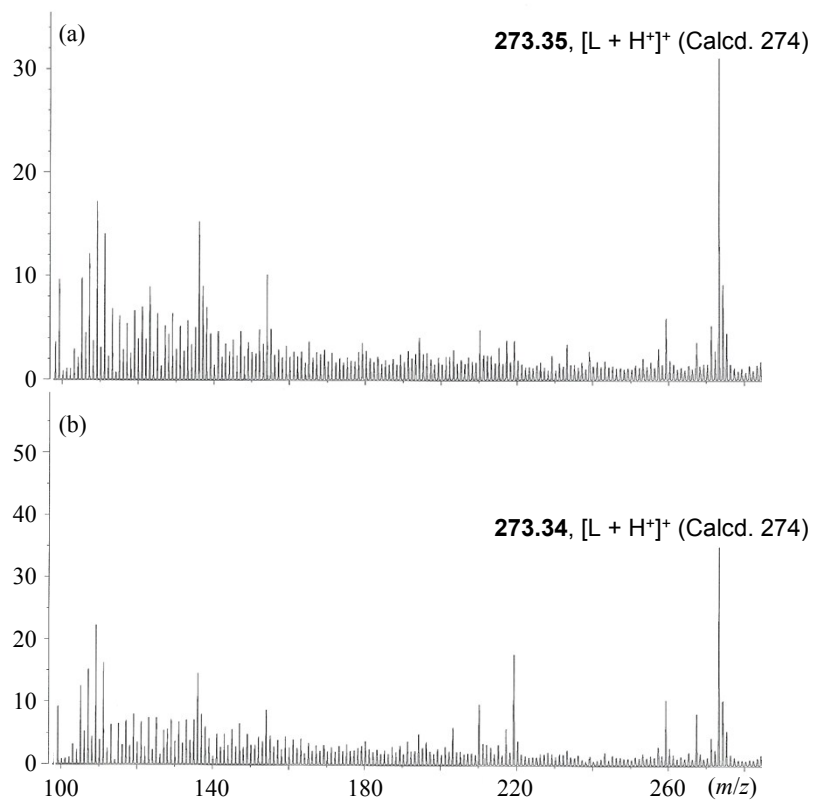

**Fig. S5** FAB-Mass data for the resulting chloroform solution of [HgBr<sub>2</sub>L] (a) and [HgI<sub>2</sub>L] (b) after UV-irradiation for 8 h.

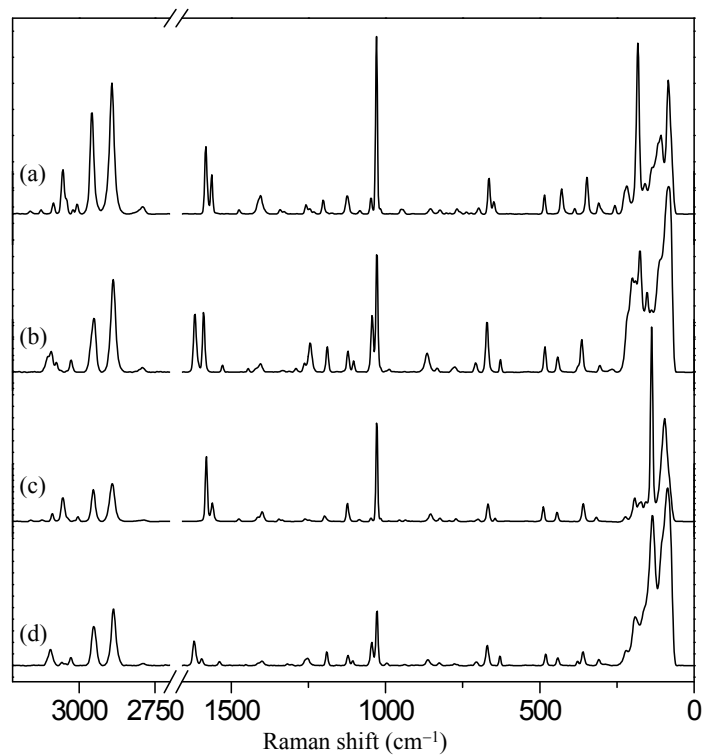

**Fig. S6** Full Raman spectra of [HgBr<sub>2</sub>L] (a), [HgI<sub>2</sub>L] (b), [H<sub>2</sub>L]<sup>2+</sup>[Hg<sub>2</sub>Br<sub>4</sub>(μ-Br)(μ-Cl)]<sup>2-</sup> (c), and [H<sub>2</sub>L]<sup>2+</sup>[HgI<sub>2</sub>(μ-Cl)]<sub>2</sub><sup>2-</sup> (d).

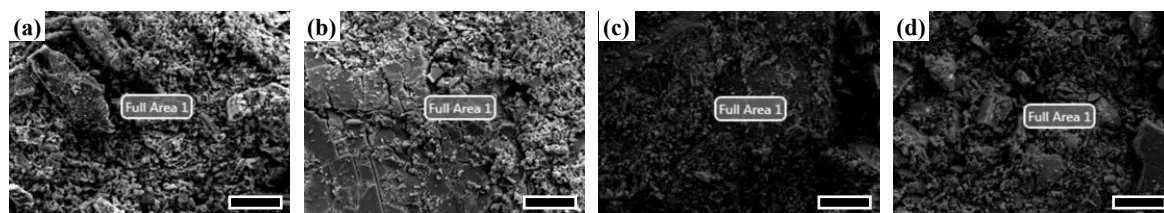

|    | (a)     |        | (b)     |        | (c)     |        | (d)     |        |
|----|---------|--------|---------|--------|---------|--------|---------|--------|
|    | Atomic% | Error% | Atomic% | Error% | Atomic% | Error% | Atomic% | Error% |
| C  | 65.33   | 10.47  | 56.8    | 11.15  | 62.67   | 8.88   | 56.98   | 9.78   |
| N  | 11.99   | 16.92  | 6.79    | 21.87  | 7.97    | 16.93  | 6.96    | 19.45  |
| Si | 9.61    | 5.7    | 7.75    | 6.71   | 10.59   | 5.91   | 7.26    | 6.43   |
| Hg | 5.07    | 2.88   | 8.28    | 2.38   | 6.04    | 3.34   | 7.46    | 3.15   |
| Cl | –       | –      | 5.71    | 6.79   | –       | –      | 8.04    | 5.55   |
| Br | 7.93    | 2.36   | 13.05   | 3.05   | 0.27    | 3.4    | 0.22    | 20.44  |
| I  | 0.07    | 57.56  | 1.61    | 12.93  | 12.46   | 20.15  | 13.08   | 3.49   |

**Fig. S7** SEM-EDX data of [HgBr<sub>2</sub>L] (a), [H<sub>2</sub>L]<sup>2+</sup>[Hg<sub>2</sub>Br<sub>4</sub>(μ-Br)(μ-Cl)]<sup>2-</sup> (b), [HgI<sub>2</sub>L] (c), and [H<sub>2</sub>L]<sup>2+</sup>[HgI<sub>2</sub>(μ-Cl)]<sub>2</sub><sup>2-</sup> (d). Bar = 50 μm.



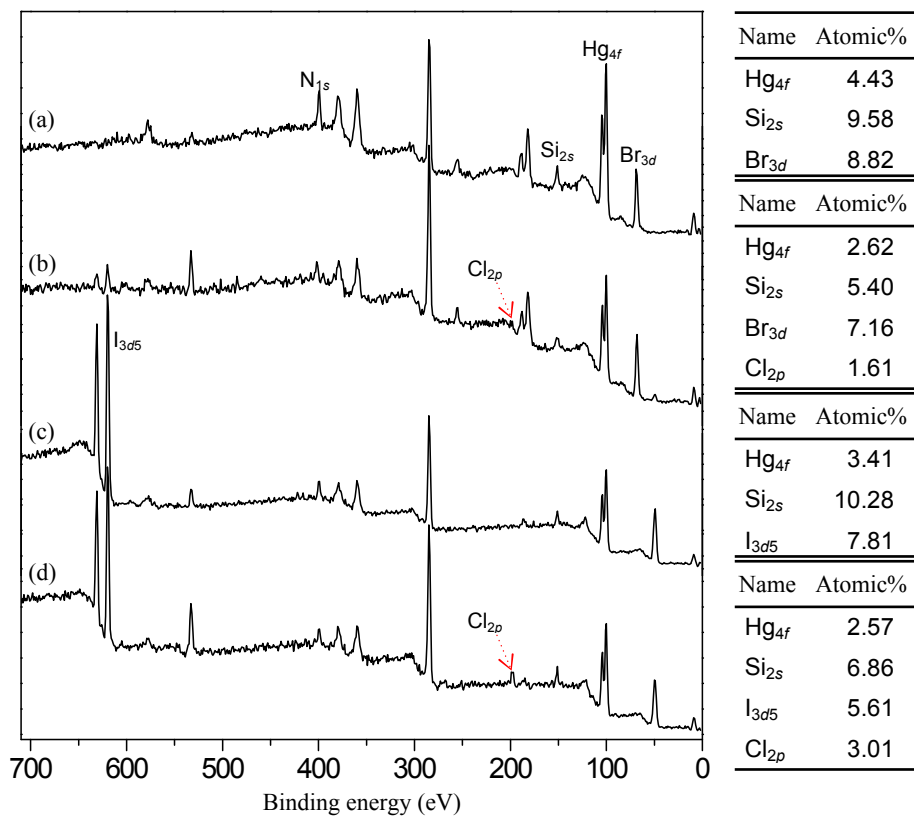

**Fig. S8** Full XPS spectra and the atomic% values of [HgBr<sub>2</sub>L] (a), [H<sub>2</sub>L]<sup>2+</sup>[Hg<sub>2</sub>Br<sub>4</sub>(μ-Br)(μ-Cl)]<sup>2-</sup> (b), [HgI<sub>2</sub>L] (c), and [H<sub>2</sub>L]<sup>2+</sup>[HgI<sub>2</sub>(μ-Cl)]<sup>2-</sup> (d).
